# Supplementary material
Source: PubMed Central journal article supplement (PMC4583082)
Supplement: supp_M059980_jlr.M059980-1.pdf [file supp_M059980_jlr.M059980-1.pdf]

Table S1. Densytometric analysis of results presented in **Fig. 1A**. Cleaved caspase 3 was not detected in INS1E cells incubated without palmitate.

|      |      | 16:0        |              |              |               |               |
|------|------|-------------|--------------|--------------|---------------|---------------|
| 0 h  | 2 h  | 4 h         | 6 h          | 8 h          | 16 h          | 24 h          |
| n.d. | n.d. | 1.00 ± 0.01 | 4.06 ± 1.67* | 6.01 ± 1.36* | 12.92 ± 3.13* | 13.38 ± 3.05* |

\*p<0.05 vs 16:0 at 4 h, n=3; n.d. – not detected

Table S2. Densytometric analysis of results presented in **Fig. 2B**.

|                   | Vehicle     |              | SCD1i         |               |
|-------------------|-------------|--------------|---------------|---------------|
|                   | BSA         | 16:0         | BSA           | 16:0          |
| LC3B II           | 1.00 ± 0.07 | 1.49 ± 0.26* | 1.21 ± 0.01*# | 0.87 ± 0.11*# |
| cleaved caspase 3 | n.d.        | 1.00 ± 0.01  | n.d.          | 3.49 ± 0.52#  |

\*p<0.05 vs BSA vehicle, #p<0.05 vs 16:0 vehicle, n=3; n.d. – not detected

Table S3. Densytometric analysis of results presented in **Fig. 2E**.

|                   | Control     |              | siRNA         |                |
|-------------------|-------------|--------------|---------------|----------------|
|                   | BSA         | 16:0         | BSA           | 16:0           |
| SCD1              | 1.00 ± 0.12 | 1.56 ± 0.16* | n.d.          | n.d.           |
| LC3B II           | 1.00 ± 0.07 | 1.59 ± 0.06* | 1.17 ± 0.05*# | 1.28 ± 0.02*#& |
| cleaved caspase 3 | n.d.        | 1.00 ± 0.06  | 0.87 ± 0.04#  | 3.81 ± 0.31#&  |

\*p<0.05 vs BSA control, #p<0.05 vs 16:0 control, &p<0.05 vs BSA siRNA, n=3; n.d. – not detected

Table S4. Densitometric analysis of results presented in **Fig. 3A**. Cleaved caspase 3 was not detected in INS1E cells incubated without palmitate.

|                   | BSA         |             |               |               | 16:0         |               |               |                 |
|-------------------|-------------|-------------|---------------|---------------|--------------|---------------|---------------|-----------------|
|                   | vehicle     | SCDi        | 3-MA          | SCDi; 3-MA    | vehicle      | SCDi          | 3-MA          | SCDi; 3-MA      |
| LC3B II           | 1.00 ± 0.01 | 1.60 ± 0.32 | 1.22 ± 0.17*# | 1.83 ± 0.15*^ | 2.07 ± 0.09* | 1.43 ± 0.14*# | 2.23 ± 0.07*^ | 3.14 ± 0.33*#&^ |
| Cleaved caspase 3 | n.d.        | n.d.        | n.d.          | n.d.          | 1.00 ± 0.01  | 21.7 ± 1.39#  | 2.45 ± 0.92#  | 15.9 ± 4.08#    |

\*p<0.05 vs BSA vehicle, #p<0.05 vs 16:0 vehicle, &p<0.05 vs BSA SCDi, ^p<0.05 vs 16:0 SCDi, n=3; n.d. – not detected

Table S5. Densitometric analysis of results presented in **Fig. 3B**. Cleaved caspase 3 was not detected in INS1E cells incubated without palmitate.

|                   | BSA         |             |               |               | 16:0         |               |              |               |
|-------------------|-------------|-------------|---------------|---------------|--------------|---------------|--------------|---------------|
|                   | vehicle     | SCDi        | MN            | SCDi; MN      | vehicle      | SCDi          | MN           | SCDi; MN      |
| LC3B II           | 1.00 ± 0.01 | 1.28 ± 0.33 | 1.63 ± 0.09*& | 1.52 ± 0.16*& | 1.59 ± 0.05* | 0.75 ± 0.03*# | 1.19 ± 0.22  | 0.67 ± 0.07*# |
| Cleaved caspase 3 | n.d.        | n.d.        | n.d.          | n.d.          | 1.00 ± 0.01  | 3.72 ± 0.76#  | 2.31 ± 0.67# | 4.22 ± 1.28#  |

\*p<0.05 vs BSA vehicle, #p<0.05 vs 16:0 vehicle, &p<0.05 vs 16:0 SCDi, n=3; n.d. – not detected

Table S6. Densitometric analysis of results presented in **Fig. 3C**. Cleaved caspase 3 was not detected in INS1E cells incubated without palmitate.

|                   | BSA         |               |                |               | 16:0           |               |                |                |
|-------------------|-------------|---------------|----------------|---------------|----------------|---------------|----------------|----------------|
|                   | vehicle     | SCDi          | E/P            | SCDi; E/P     | vehicle        | SCDi          | E/P            | SCDi; E/P      |
| LC3B II           | 1.00 ± 0.01 | 1.46 ± 0.13*# | 2.26 ± 0.01*^& | 1.77 ± 0.17*# | 2.17 ± 0.07*^& | 1.63 ± 0.09*# | 2.05 ± 0.09*^& | 1.82 ± 0.14*#& |
| Cleaved caspase 3 | n.d.        | n.d.          | n.d.           | n.d.          | 1.00 ± 0.01    | 3.97 ± 1.10#  | 1.74 ± 0.01#   | 5.11 ± 1.56#   |

\*p<0.05 vs BSA vehicle, #p<0.05 vs 16:0 vehicle, &p<0.05 vs BSA SCDi, ^p<0.05 vs 16:0 SCDi, n=3; n.d. – not detected

Table S7. Densytometric analysis of results presented in **Fig. 6A**.

|                                | Vehicle     |              | SCD1i        |               |
|--------------------------------|-------------|--------------|--------------|---------------|
|                                | BSA         | 16:0         | BSA          | 16:0          |
| CHOP                           | 1.00 ± 0.13 | 1.45 ± 0.29* | 1.67 ± 0.40* | 1.28 ± 0.24*# |
| BiP                            | 1.00 ± 0.11 | 1.50 ± 0.46* | 1.32 ± 0.29* | 0.77 ± 0.09*# |
| p-eIF2 $\alpha$ /eIF2 $\alpha$ | 1.00 ± 0.08 | 1.35 ± 0.20* | 1.36 ± 0.21* | 0.77 ± 0.09*# |

\*p<0.05 vs BSA control, #p<0.05 vs 16:0 control

Table S8. Densytometric analysis of results presented in **Fig. 6B**.

|                   | Vehicle     |              | SCD1i         |                |
|-------------------|-------------|--------------|---------------|----------------|
|                   | BSA         | 16:0         | BSA           | 16:0           |
| caspase 9         | 1.00 ± 0.01 | 1.04 ± 0.14  | 1.12 ± 0.20   | 1.04 ± 0.27    |
| cleaved caspase 9 | 1.00 ± 0.05 | 4.47 ± 1.35* | 1.62 ± 0.18*# | 29.70 ± 3.15*# |

\*p<0.05 vs BSA control, #p<0.05 vs 16:0 control
